# Supplementary material for: Evaluating the re-identification risk of a clinical study report anonymized under EMA Policy 0070 and Health Canada Regulations
Source: Springer Nature journal article supplement (doi:10.1186/s13063-020-4120-y), 2020-02-18
Supplement: MOESM4 [file 17720300]

## **Additional file 4: Search Keywords**

- diabetes
- insulin
- cataract
- surgery
- NPDR (nonproliferative diabetic retinopathy)
- retinopathy
- eyesight failing
- cataract surgery
- study
- clinical trial
- test
- macular edema
- medication
- Nepafenac (although during the study the patients may not have known the name)
- Nevanac (although during the study the patients may not have known the name)
